# Supplementary material for: Chronic Inflammatory Disease and Osteopathy: A Systematic Review
Source: PubMed Central journal article supplement (PMC4363664; doi:10.1371/journal.pone.0121327), 2015-03-17
Supplement: pone.0121327.s002.pdf [file pone.0121327.s002.pdf]

| Author/year      | Conflict of interest | Reporting funding source | Ethical approval | Informed consent | Confidentiality | Declaration of interest | Access to data | Trial registration | Data collection | Data management | Data monitoring committee |
|------------------|----------------------|--------------------------|------------------|------------------|-----------------|-------------------------|----------------|--------------------|-----------------|-----------------|---------------------------|
| Bockenbauer 2002 | HR                   | HR                       | LR               | LR               | HR              | HR                      | HR             | HR                 | HR              | HR              | HR                        |
| Guiney 2005      | HR                   | HR                       | LR               | LR               | HR              | HR                      | HR             | HR                 | HR              | HR              | HR                        |
| Noll 2008        | LR                   | LR                       | LR               | LR               | HR              | LR                      | HR             | HR                 | HR              | HR              | HR                        |
| Noll 2009        | LR                   | LR                       | LR               | LR               | HR              | LR                      | HR             | HR                 | HR              | HR              | HR                        |
| Zanotti 2012     | LR                   | HR                       | LR               | LR               | HR              | LR                      | HR             | HR                 | HR              | HR              | HR                        |
| Lombardini 2009  | HR                   | HR                       | LR               | LR               | HR              | HR                      | HR             | HR                 | HR              | HR              | HR                        |
| Hallas 1997      | HR                   | LR                       | HR               | NA               | NA              | HR                      | NA             | NA                 | NA              | HR              | HR                        |
| Attali 2013      | LR                   | HR                       | LR               | LR               | HR              | LR                      | HR             | HR                 | HR              | HR              | HR                        |
| Hundscheid 2007  | HR                   | HR                       | LR               | LR               | HR              | HR                      | HR             | HR                 | HR              | HR              | HR                        |
| Florance 2012    | LR                   | HR                       | LR               | LR               | HR              | LR                      | HR             | HR                 | HR              | HR              | HR                        |
